# Supplementary material for: Color improves edge classification in human vision
Source: PubMed Central journal article supplement (PMC6827913; doi:10.1371/journal.pcbi.1007398), 2019-10-18
Supplement: pcbi.1007398.s001.pdf [file pcbi.1007398.s001.pdf]

## S1 Figure: Individual response bias

For each participant, we calculated a measure of response bias  $c$  given by  $c = -\frac{z(FA)+z(H)}{2}$ . A value of  $c$  less than 0 indicates that the observer is biased to respond “other” whereas a value greater than 0 indicates that the observer is biased to respond “shadow”. S1Figure shows that most of our participants had a bias towards responding “shadow”, and this bias is larger in the pure-luminance condition than in the color condition.

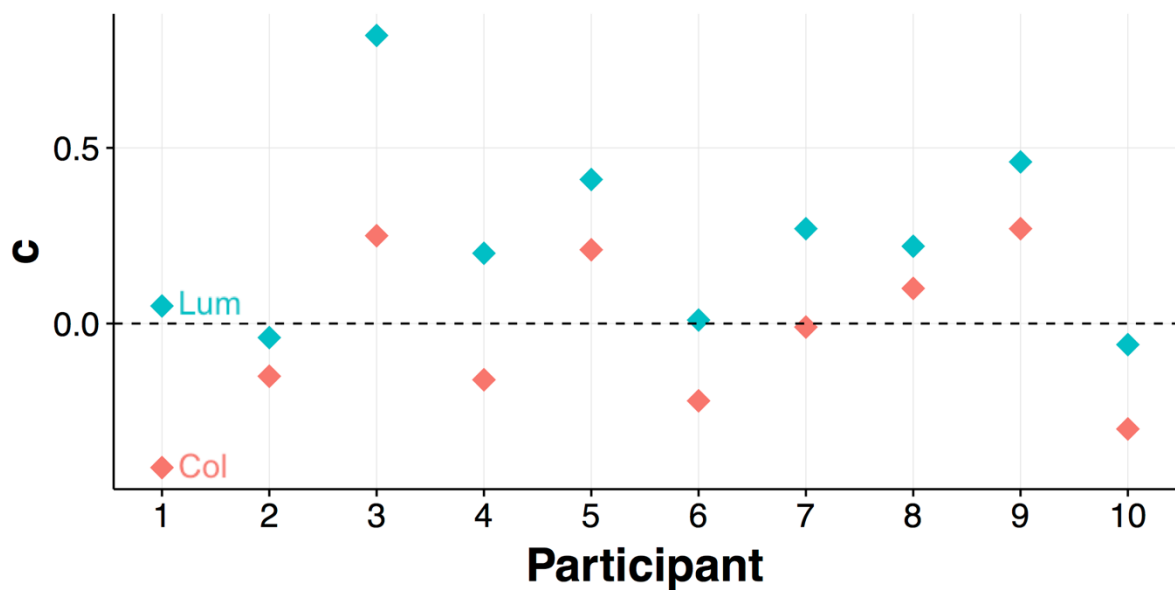

**Figure S1.** Observer response bias  $c$  in the psychophysical experiment, for the luminance-only (Lum) and color (Col) conditions.
